# Supplementary material for: Cluster formation of Janus polymer microgels
Source: Royal Society of Chemistry journal article supplement (doi:10.1039/b904316k), 2009-01-01
Supplement: b904316k.pdf [file b904316k.pdf]

## Supplementary Information

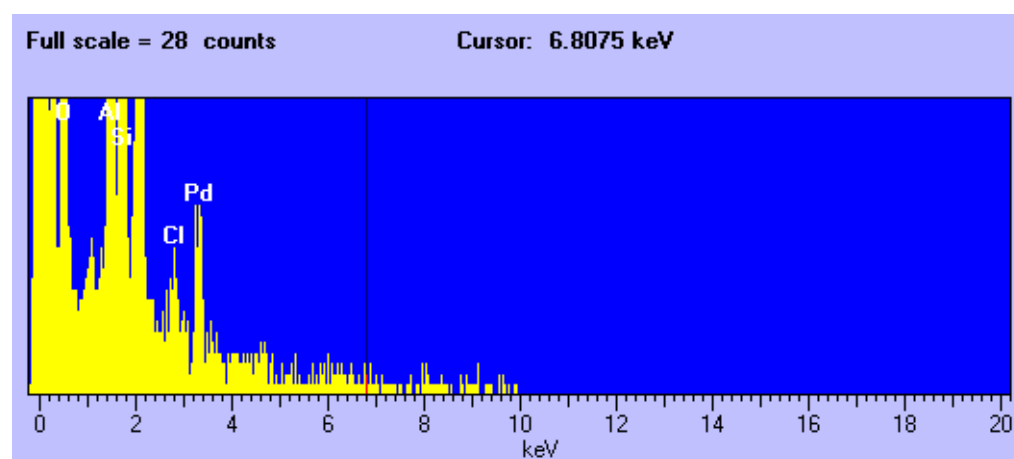

SI 1. Energy dispersive X-ray spectrum of and adsorbed Cl-PVP microgel layer.

a)

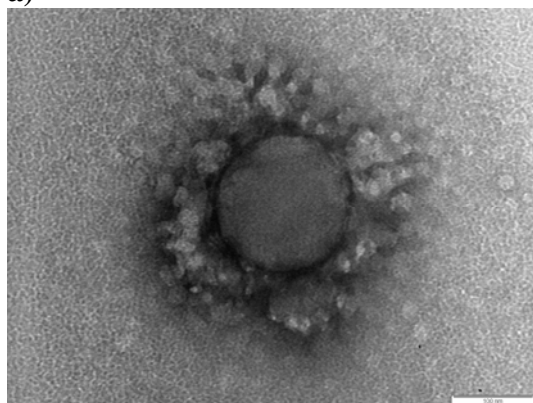

b)

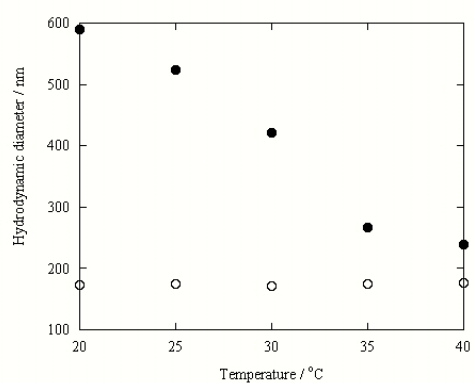

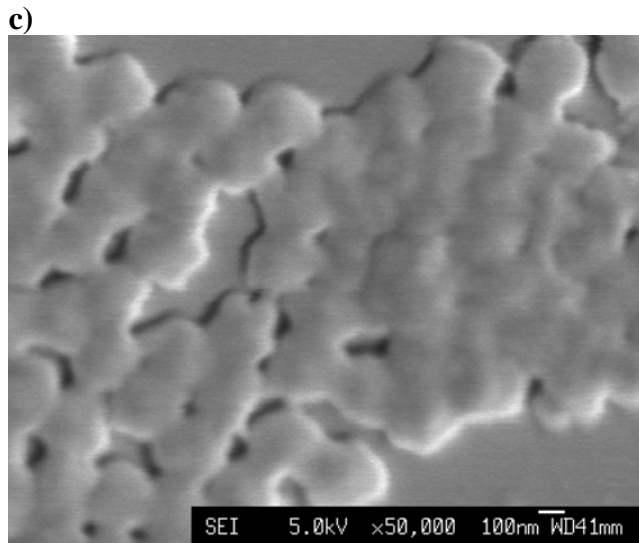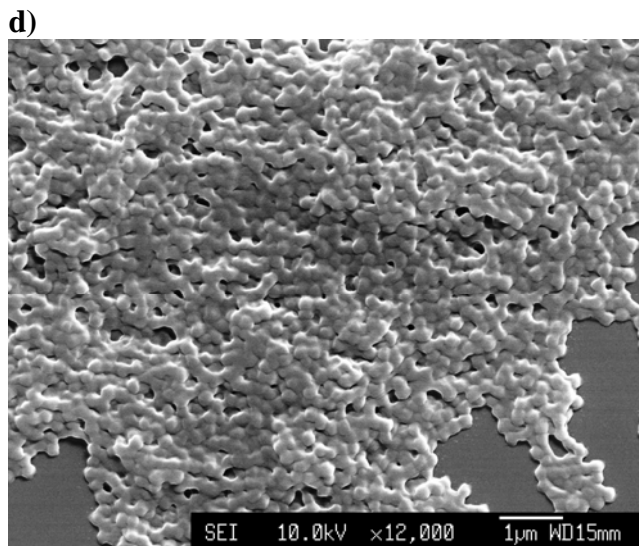

**SI 2. a)** Negatively stained TEM image of a Cl-PVP microgel particle homogeneously grafted with PNIPAM **b)** Hydrodynamic diameter as a function of temperature for Cl-PVP microgel particles ( $\circ$ ) and Cl-PVP microgel particles homogeneously grafted with PNIPAM ( $\bullet$ ) **c)** SEM of Cl-PVP microgel particles homogeneously grafted with PNIPAM at 20 °C **d)** SEM of Cl-PVP microgel particles homogeneously grafted with PNIPAM at 50 °C.
